# Supplementary material for: A facile hydrothermal synthesis of MnO2 nanorod–reduced graphene oxide nanocomposites possessing excellent microwave absorption properties
Source: Royal Society of Chemistry journal article supplement (doi:10.1039/c5ra15165a), 2015-01-01
Supplement: c5ra15165a1.pdf [file c5ra15165a1.pdf]

Electronic Supplementary Material (ESI) for RSC Advances.

This journal is © The Royal Society of Chemistry 2015

**A facile hydrothermal synthesis for MnO<sub>2</sub> nanorods-reduced  
graphene oxide nanocomposites possessing excellent  
microwave absorption properties**

Yan Wang<sup>a</sup>, Hongtao Guan<sup>a</sup>, Shangfeng Du<sup>b\*</sup>, Yude Wang<sup>a,c\*</sup>

<sup>a</sup> *Department of Materials Science and Engineering, Yunnan University, 650091  
Kunming, People's Republic of China*

<sup>b</sup> *School of Chemical Engineering, University of Birmingham, Edgbaston,  
Birmingham B15 2TT, UK*

<sup>c</sup> *Yunnan Province Key Lab of Micro-Nano Materials and Technology, Yunnan  
University, 650091 Kunming, People's Republic of China*

**\* Corresponding authors:**

School of Physical Science and Technology, Yunnan University, 650091 Kunming,  
People's Republic of China. Tel: 86-871-65031124, Fax: 86-871-65153832. E-mail:  
ydwang@ynu.edu.cn (Y. D. Wang)

School of Chemical Engineering, University of Birmingham, Edgbaston, Birmingham  
B15 2TT, UK, E-mail: s.du@bham.ac.uk (S.F. Du)

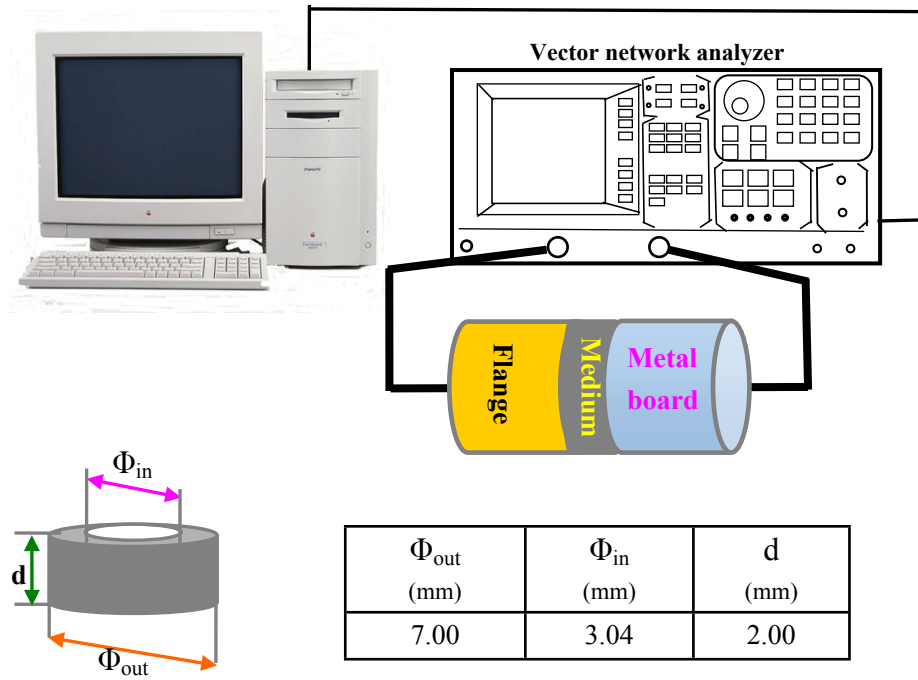

**Fig. S1** A scheme of test apparatus and the sample for measurement.
